# Supplementary material for: Anticancer and Multidrug Resistance-Reversal Effects of Solanidine Analogs Synthetized from Pregnadienolone Acetate
Source: PubMed Central journal article supplement (PMC6271930; doi:10.3390/molecules19022061), 2014-02-17
Supplement: molecules-19-02061-s001.pdf [file molecules-19-02061-s001.pdf]

## Supplementary Materials

**Table S1.** The list of the selected genes, together with their functional categories and primer sequences.

| Gene# | RefSeqID  | FxnCat                                                                 | GeneName                                                         | Forward                | Reverse                |
|-------|-----------|------------------------------------------------------------------------|------------------------------------------------------------------|------------------------|------------------------|
| 1     | NM_033379 | cyclin-dependent protein kinase activity                               | CDC2; cell division cycle 2_G1 to S and G2 to M                  | aatggaaccaggaagcctagc  | agaaatcgtttggctgatcat  |
| 2     | NM_001798 | cyclin-dependent protein kinase activity                               | CDK2; cyclin-dependent kinase 2                                  | agactttggactagccagagc  | gcagcccaggaggattcag    |
| 3     | NM_014326 | calmodulin regulated protein kinase activity                           | DAPK2; death-associated protein kinase 2                         | gctcactttgatctcaagcca  | aaatccggcgtcccaaaaat   |
| 4     | NM_001348 | calmodulin regulated protein kinase activity                           | DAPK3; death-associated protein kinase 3                         | ggaggacgtggaggaccatta  | ttggctgcgtactccttgc    |
| 5     | NM_003330 | glutathione-disulfide reductase activity                               | TXNRD1; thioredoxin reductase 1                                  | ctaaggaggcagccaatag    | gtatgcaaccacattcacaca  |
| 6     | NM_002423 | metalloendopeptidase activity                                          | matrix metalloproteinase 7 (matrilysin uterine)                  | gaaacacgctggctcatgc    | aggaatgccatacccaaga    |
| 7     | NM_057749 | cyclin-dependent protein kinase regulator activity                     | cyclin E2                                                        | tgcttacgtcactgatgtgc   | ccaggagatgattgtacaggac |
| 8     | NM_032989 | structural constituent of ribosome                                     | BCL2-antagonist of cell death                                    | atgagtgcagagtttggac    | gatccaccaggactggaaga   |
| 9     | NM_000389 | cyclin-dependent protein kinase inhibitor activity                     | cyclin-dependent kinase inhibitor 1A (p21 Cip1)                  | gagactctcagggtcgaacag  | cttctgtggcggtattagg    |
| 10    | NM_001924 | DNA repair                                                             | growth arrest and DNA-damage-inducible 45 alpha                  | tggtgacgaatccattcatc   | acttcagtgaatttggctcagt |
| 11    | NM_004064 | transforming growth factor beta receptor_cytoplasmic mediator activity | CDKN1B; cyclin-dependent kinase inhibitor 1B (p27_Kip1)          | ACAAAAGAGCCAACAGAACAG  | AGGATGTCCATTCCATGAAG   |
| 12    | NM_000633 | humoral immune response                                                | BCL2; B-cell CLL/lymphoma 2                                      | ggacaacatcgccctgtgg    | agccaggagaaatcaaacagag |
| 13    | NM_007297 | DNA binding                                                            | BRCA1; breast cancer 1_early onset                               | GAAGACTGCTCAGGGCTATC   | TTTCTGCTGGAGCTTTATC    |
| 14    | NM_005228 | protein serine/threonine kinase activity                               | EGFR; epidermal growth factor receptor                           | tgtgcaactggagagcatc    | gcttgatcacacttttggcag  |
| 15    | NM_001964 | transcription factor activity                                          | EGR1; early growth response 1                                    | cctgaccgagagcttttcc    | cggccagtataggtgatggg   |
| 16    | NM_002133 | heme oxygenase (decycling) activity                                    | HMOX1; heme oxygenase (decycling) 1                              | gagggtgatagaagagccaa   | tgaggggctctgctccttg    |
| 17    | NM_002592 | leading strand elongation                                              | proliferating cell nuclear antigen                               | ACTAAAATGCGCCGCAAT     | TCTCCTGGTTTGGTGCTCAA   |
| 18    | NM_032991 | cysteine-type peptidase activity                                       | CASP3_caspase 3_apoptosis-related cysteine peptidase             | CTGGACTGTGGCATTGAGACA  | TCGGCCTCCACTGGTATTTT   |
| 19    | NM_000963 | prostaglandin-endoperoxide synthase activity                           | PTGS2; prostaglandin-endoperoxide synthase 2                     | ctagagccctcctcctgtg    | ggggatcaggatgaatttctt  |
| 20    | NM_000546 | nuclease activity                                                      | TP53; tumor protein p53 (Li-Fraumeni syndrome)                   | gtgcttccacgacggtga     | ggctcagcgttagatctg     |
| 21    | NM_005427 | transcription factor activity                                          | TP73; tumor protein p73                                          | tgctgtttacaagaagcgg    | gctggagcagactgtcctc    |
| 22    | NM_000660 | transforming growth factor beta receptor binding                       | TGFB1; transforming growth factor_beta 1                         | TACTACGCCAAGGAGGTCAC   | GGAGCTCTGATGTGTGAAG    |
| 23    | NM_000594 | tumor necrosis factor receptor binding                                 | TNF; tumor necrosis factor (TNF superfamily_member 2)            | tgtagcaaacctcaagctga   | cctctgatggcaccaccag    |
| 24    | NM_003844 | death receptor activity                                                | TNFRSF10A; tumor necrosis factor receptor superfamily_member 10a | atgggaacatagcccttggg   | caaatgttgaagcattgtgt   |
| 25    | NM_003842 | death receptor activity                                                | TNFRSF10B; tumor necrosis factor receptor superfamily_member 10b | tgctccagaggatgtcaag    | ggtcacgctcctccaca      |
| 26    | NM_001066 | tumor necrosis factor receptor activity                                | TNFRSF1B; tumor necrosis factor receptor superfamily_member 1B   | cccagggtgcatctacacc    | tggtacagaagactttgcatgt |
| 27    | NM_003327 | tumor necrosis factor receptor activity                                | TNFRSF4; tumor necrosis factor receptor superfamily_member 4     | ccgggcttcaaacgacg      | cagactgtcctgtgtggc     |
| 28    | NM_001455 | transcription factor activity                                          | FOXO3A; forkhead box O3A                                         | ggctggaagaactccatccg   | cagggttgatgatccaccaag  |
| 29    | NM_004104 | fatty acid metabolism                                                  | FASN; fatty acid synthase                                        | cagattcactccgaggaacac  | gccctctgaagtcgaagaaga  |
| 30    | NM_001749 | calpain activity                                                       | CAPNS1; calpain_small subunit 1                                  | cgacgactcagatgaaagt    | gggtccagtcaggaatacat   |
| 31    | NM_001239 | cyclin-dependent protein kinase activity                               | CCNH; cyclin H                                                   | tcactgtgcattttggcct    | gtgcttctctgtccaagag    |
| 32    | NM_001240 | transcription from Pol II promoter                                     | CCNT1; cyclin T1                                                 | tcacacagttccctggaaattc | gatggagacaagtatgtctacc |
| 33    | NM_001241 | transcription from Pol II promoter                                     | CCNT2; cyclin T2                                                 | gatcaccattgaacaccaca   | ggttgaagatgcagactgttg  |
| 34    | NM_003592 | protein binding                                                        | CUL1; cullin 1                                                   | accacagagatcgggtttg    | ccagtcagcaatcctattca   |
| 35    | NM_001168 | receptor activity                                                      | BIRC5; baculoviral IAP repeat-containing 5 (survivin)            | ctggcccagtggttctctg    | ggctcttctctgccagttc    |
| 36    | NM_013366 | ubiquitin-dependent protein catabolism                                 | APC2; anaphase-promoting complex subunit 2                       | CTGTCATCCTGTCCAGTGAG   | TGGCTTGGTCTGAAAATAC    |
| 37    | NM_013367 | ubiquitin-dependent protein catabolism                                 | APC4; anaphase-promoting complex subunit 4                       | cagtagaaagcagtggtctaca | agagcttctccaaggacgag   |
| 38    | NM_053056 | cyclin-dependent protein kinase regulator activity                     | CCND1; cyclin D1 (PRAD1; parathyroid adenomatosis 1)             | aggaacagaagtgcaggag    | ccacgaacatgcaagtggc    |
| 39    | NM_002388 | chromatin binding                                                      | MCM3; MCM3 minichromosome maintenance deficient 3                | GCCAGGACATCTCCAGTTAC   | TGGCTTTTCTCCTCTTCATC   |

Table S1. Cont.

| Gene# | RefSeqID  | FxnCat                                                 | GeneName                                                             | Forward                | Reverse                   |
|-------|-----------|--------------------------------------------------------|----------------------------------------------------------------------|------------------------|---------------------------|
| 40    | NM_006739 | chromatin binding                                      | MCM5; minichromosome maintenance deficient 5_ cell division cycle 46 | gtgctccaggacatccagg    | gatgatgccaggatcttcac      |
| 41    | NM_004507 | DNA repair                                             | HUS1; HUS1 checkpoint homolog (S. pombe)                             | gggccagatcctgatgttagt  | gggtgcttcagaggctaag       |
| 42    | NM_133341 | DNA repair                                             | RAD17; RAD17 homolog (S. pombe)                                      | gaagtgcataaacagcctcca  | tgacagcacagcatctgattt     |
| 43    | NM_000077 | transcription factor activity                          | CDKN2A; cyclin-dependent kinase inhibitor 2A                         | cgacttcagggtgcccacatt  | ctcaaatcctctggagggacc     |
| 44    | NM_078487 | transcription factor activity                          | CDKN2B; cyclin-dependent kinase inhibitor 2B                         | acggagtcaaccgtttcgg    | gcatctaggttccagccc        |
| 45    | NM_003334 | ubiquitin activating enzyme activity                   | UBE1; ubiquitin-activating enzyme E1                                 | tgtcactgcctacactggac   | gacagaactcaccactcgc       |
| 46    | NM_007313 | protein-tyrosine kinase activity                       | ABL1; v-abl Abelson murine leukemia viral oncogene homolog 1         | gcttcttggtcgtgagagt    | aggagacgtagagcttgcca      |
| 47    | NM_001826 | cyclin-dependent protein kinase activity               | CKS1B; CDC28 protein kinase regulatory subunit 1B                    | agagcgcacatgctgcacaaa  | accagcttggctatgctctg      |
| 48    | NM_001827 | cyclin-dependent protein kinase activity               | CKS2; CDC28 protein kinase regulatory subunit 2                      | aggagtgaggagacttggtg   | ttggaagaggtcgtctaaagaga   |
| 49    | NM_000059 | single-stranded DNA binding                            | BRCA2; breast cancer 2_ early onset                                  | caccaccaccccttagttcta  | tgacttgcagcttcttctgatt    |
| 50    | NM_005983 | ubiquitin-dependent protein catabolism                 | SKP2; S-phase kinase-associated protein 2 (p45)                      | gtttgtaagaggtggtatcgcc | agcaaccgaccagtcacatc      |
| 51    | NM_030655 | DNA helicase activity                                  | DDX11; DEAD/H (Asp-Glu-Ala-Asp/His) box polypeptide 11               | cttcacacctattccatccagg | caaagtacggagccaagaga      |
| 52    | NM_005192 | Protein tyrosine/serine/threonine phosphatase activity | CDKN3; cyclin-dependent kinase inhibitor 3                           | actgctatggaggactggga   | ctcgcaggctgtctatggc       |
| 53    | NM_001069 | control                                                | tubulin beta 2A                                                      | AGACCGCATCATGAACACCTT  | GGAGTAGGTTTCATCTGTGTTTCC  |
| 54    | NM_001101 | control                                                | Beta-Actin                                                           | aaccgcgagaagatgaccc    | atcacgatgccagtgttacg      |
| 55    | NM_000194 | control                                                | HPRT                                                                 | actggcaaaacaatgcagact  | caacacttctgtgggtcct       |
| 56    | NM_002639 | control                                                | serpin peptidase inhibitor clade B (ovalbumin) member 5              | CCAAACCAGTGCAGATGATGAA | GGATGAACATGCTGAGATGCTTATT |
| 57    |           | negative control                                       | empty                                                                |                        |                           |
| 58    |           | negative control                                       | empty                                                                |                        |                           |
| 59    |           | negative control                                       | empty                                                                |                        |                           |
| 60    |           | negative control                                       | empty                                                                |                        |                           |
| 61    |           | negative control                                       | empty                                                                |                        |                           |
| 62    |           | negative control                                       | empty                                                                |                        |                           |
| 63    |           | negative control                                       | empty                                                                |                        |                           |
| 64    |           | negative control                                       | empty                                                                |                        |                           |
